# Supplementary material
Source: publisher figshare collection journal article supplement (https://springernature.figshare.com/ndownloader/files/22753661)
Supplement: Supplementary file 1 [file 22753661]

SOLUTION FOR ARIK AIR

>> Optimal solution FOUND

>> Maximum = 1/19

*** RESULTS - VARIABLES ***

╔═════════════╤═════════════╤═════════════╤═════════════╗

║ Variable│ Value│ Obj. Cost│ Reduced Cost║

╠═════════════╪═════════════╪═════════════╪═════════════╣

║ z1│ 0│ 1│ 28/19║

╟─────────────┼─────────────┼─────────────┼─────────────╢

║ Z2│ 1/19│ 1│ 0║

╚═════════════╧═════════════╧═════════════╧═════════════╝

*** RESULTS - CONSTRAINTS ***

╔═══════════╤═══════════╤═══════════╤═══════════╗

║ Constraint│ Value│ RHS│ Dual Price║

╠═══════════╪═══════════╪═══════════╪═══════════╣

║ row1│ 1│ 1│ 1/19║

╟───────────┼───────────┼───────────┼───────────╢

║ Row2│ 18/19│ 1│ 0║

╚═══════════╧═══════════╧═══════════╧═══════════╝

SOLUTION FOR AERO CONTRACTORS

>> Optimal solution FOUND

>> Minimum = 1/19

*** RESULTS - VARIABLES ***

╔═════════════╤═════════════╤═════════════╤═════════════╗

║ Variable│ Value│ Obj. Cost│ Reduced Cost║

╠═════════════╪═════════════╪═════════════╪═════════════╣

║ Y1│ 1/19│ 1│ 0║

╟─────────────┼─────────────┼─────────────┼─────────────╢

║ y2│ 0│ 1│ -1/19║

╚═════════════╧═════════════╧═════════════╧═════════════╝

*** RESULTS - CONSTRAINTS ***

╔═══════════╤═══════════╤═══════════╤═══════════╗

║ Constraint│ Value│ RHS│ Dual Price║

╠═══════════╪═══════════╪═══════════╪═══════════╣

║ Row1│ 47/19│ 1│ 0║

╟───────────┼───────────┼───────────┼───────────╢

║ row2│ 1│ 1│ 1/19║

╚═══════════╧═══════════╧═══════════╧═══════════╝
